# Supplementary material for: Quality and Predictors of Diabetes Care Among Patients With Schizophrenia: A Danish Nationwide Study
Source: Atypon-hosted journal article supplement (doi:10.1176/appi.ps.201600460), 2017-10-16
Supplement: appi.ps.201600460.ds001.pdf [file appi.ps.201600460.ds001.pdf]

|          |   |   |      |           |      |           |      |          |   |   |      |          |   |   |
|----------|---|---|------|-----------|------|-----------|------|----------|---|---|------|----------|---|---|
| .94-1.14 | - | - | .93  | .22-3.99  | 1.52 | .93-2.49  | 1.06 | .96-1.17 | - | - | 1.00 | .89-1.13 | - | - |
|          |   |   |      |           |      |           |      |          |   |   |      |          |   |   |
| .93-1.07 | - | - | 1.14 | .52-2.52  | -    | -         | 1.04 | .96-1.13 | - | - | .95  | .90-1.00 | - | - |
| .91-1.07 | - | - | 2.09 | .99-4.44  | -    | -         | 1.02 | .94-1.11 | - | - | .99  | .93-1.06 | - | - |
|          |   |   |      |           |      |           |      |          |   |   |      |          |   |   |
| .89-1.12 | - | - | 1.67 | .80-3.46  | 1.81 | 1.00-3.27 | 1.06 | .93-1.22 | - | - | .98  | .87-1.11 | - | - |
| .84-1.09 | - | - | 1.62 | .79-3.32  | 1.62 | 1.07-2.45 | 1.06 | .93-1.19 | - | - | .98  | .89-1.09 | - | - |
| .94-1.19 | - | - | 2.62 | 1.44-4.75 | 3.19 | 1.80-5.65 | 1.03 | .92-1.17 | - | - | .99  | .88-1.12 | - | - |

e, >1621

not possible due to collapse of the statistical model
